# Supplementary material for: Magnesium and aluminum complexes bearing bis(5,6,7-trihydro quinolyl)-fused benzodiazepines for ε-caprolactone polymerization
Source: Royal Society of Chemistry journal article supplement (doi:10.1039/c6qi00177g), 2016-01-01
Supplement: c6qi00177g1.pdf [file c6qi00177g1.pdf]

## Supporting information

for

### Magnesium and aluminum complexes bearing bis(5,6,7-trihydroquinolyl)-fused benzodiazepines for $\epsilon$ -caprolactone polymerization

Natesan Mannangatti Rajendran,<sup>a</sup> Yanxia Xi,<sup>a</sup> Wenjuan Zhang,<sup>\*,a,b</sup> Pierre Braunstein,<sup>\*,c</sup> Tongling Liang,<sup>a</sup> Wen-Hua Sun<sup>\*,a</sup>

- <sup>a</sup> Key Laboratory of Engineering Plastics and Beijing National Laboratory for Molecular Science, Institute of Chemistry, Chinese Academy of Sciences, Beijing 100190, China. E-mail: whsun@iccas.ac.cn
- <sup>b</sup> School of Materials Science and Engineering, Beijing Institute of Fashion Technology, Beijing 100029, China. E-mail: zhangwj@bift.edu.cn
- <sup>c</sup> Laboratoire de Chimie de Coordination, Institut de Chimie (UMR 7177 CNRS), Université de Strasbourg, 4, rue Blaise Pascal - CS 90032, 67081 Strasbourg, France. E-mail: braunstein@unistra.fr

#### 1. <sup>1</sup>H NMR spectra of L1-L3

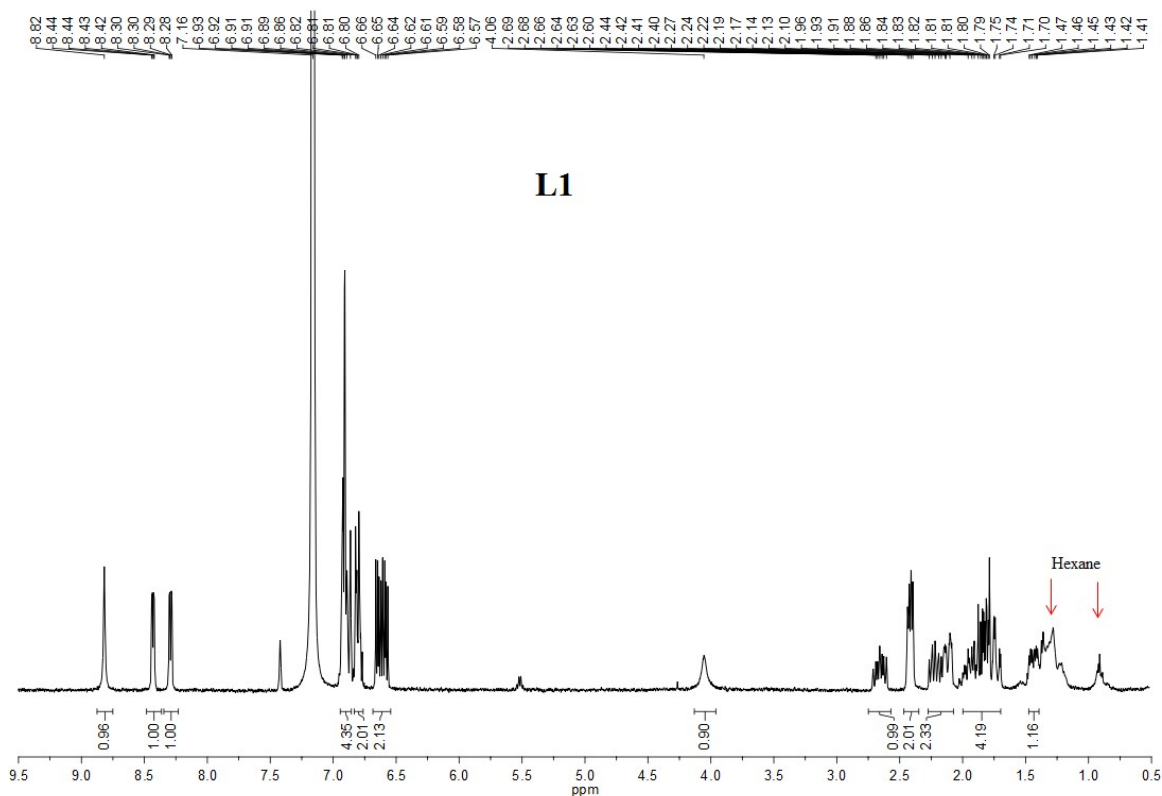

<sup>1</sup>H NMR Spectrum of L1 in C<sub>6</sub>D<sub>6</sub> (The hexane present in C<sub>6</sub>D<sub>6</sub>)

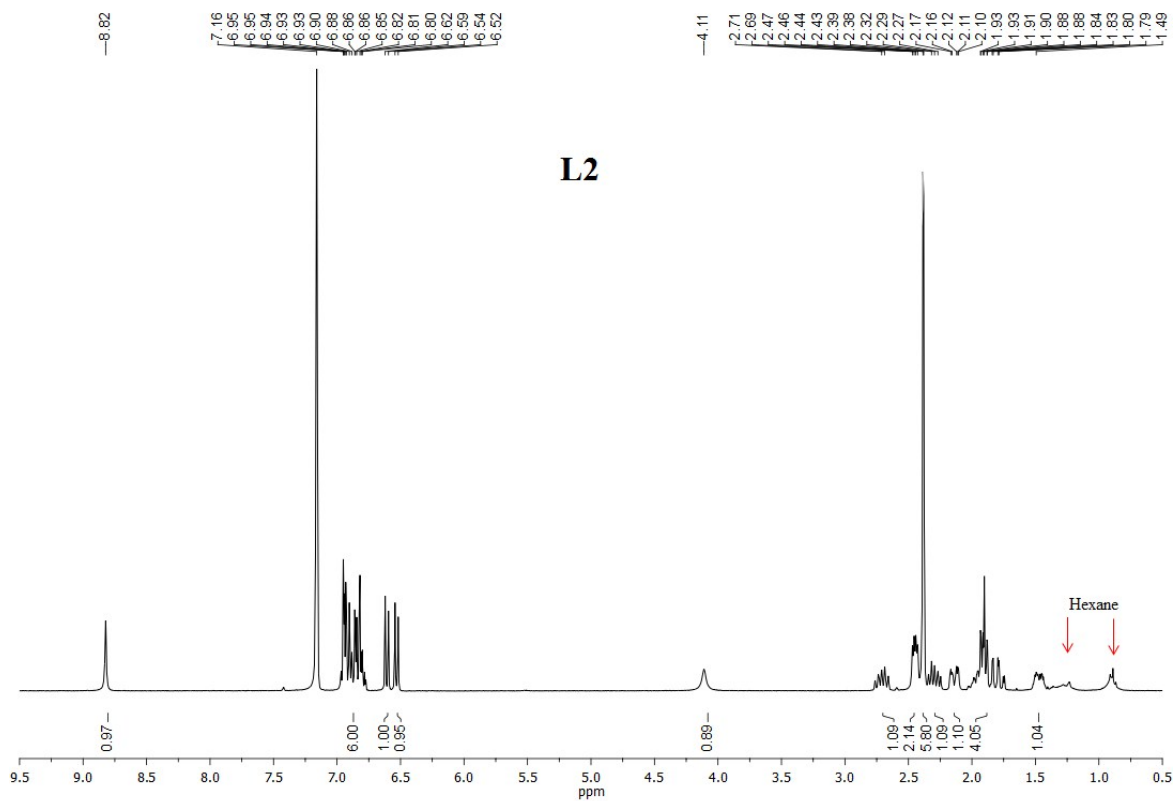

$^1\text{H}$  NMR Spectrum of **L2** in  $\text{C}_6\text{D}_6$  (The hexane present in  $\text{C}_6\text{D}_6$ )

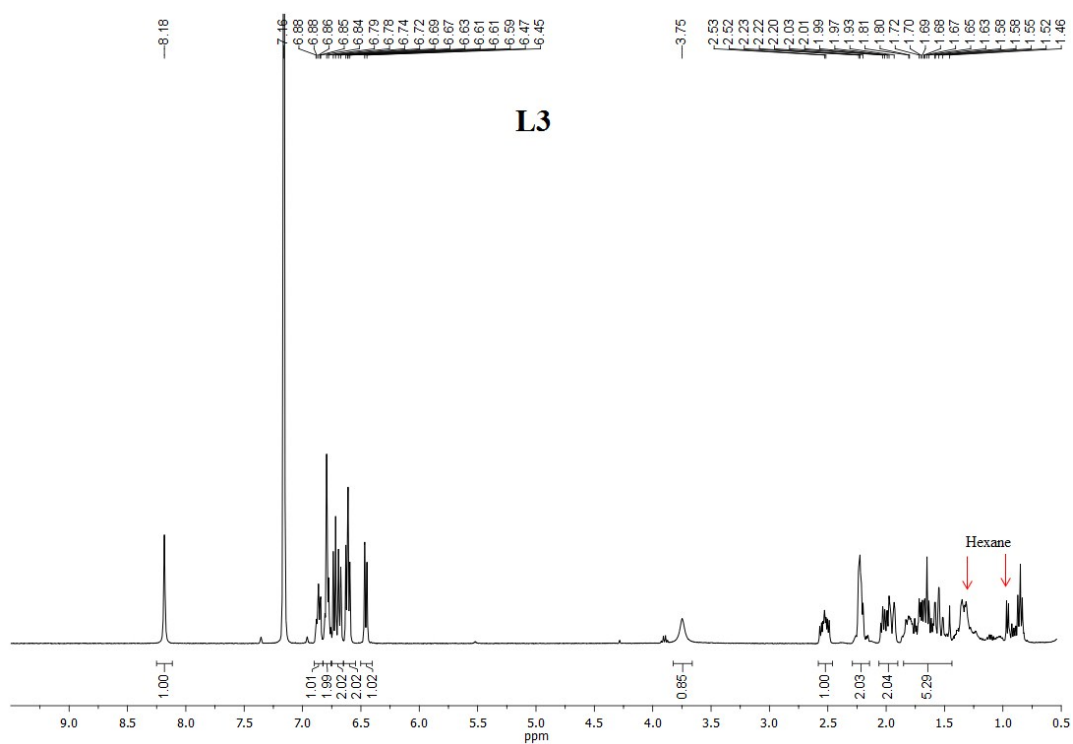

$^1\text{H}$  NMR Spectrum of **L3** in  $\text{C}_6\text{D}_6$  (The hexane present in  $\text{C}_6\text{D}_6$ )

## 2. $^1\text{H}$ NMR spectrum of C3

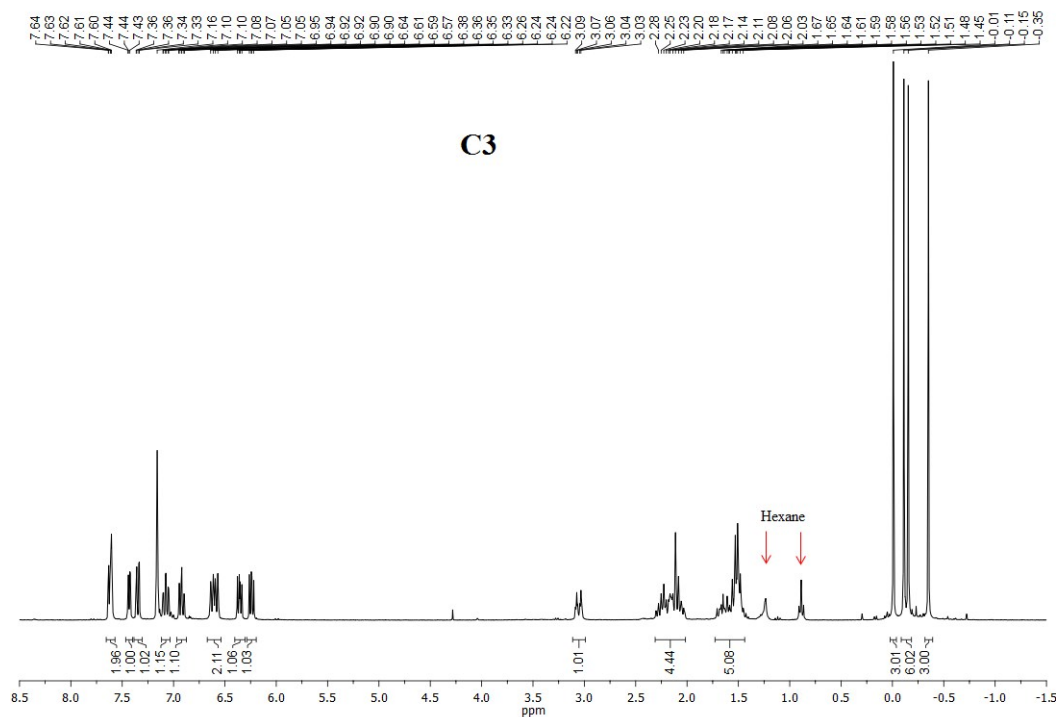

$^1\text{H}$  NMR Spectrum of **C3** in  $\text{C}_6\text{D}_6$  (The hexane present in  $\text{C}_6\text{D}_6$ )

## 3. $^1\text{H}$ NMR spectrum monitoring of reaction between C3 and BnOH in a 1 : 1 ratio in benzene- $d_6$

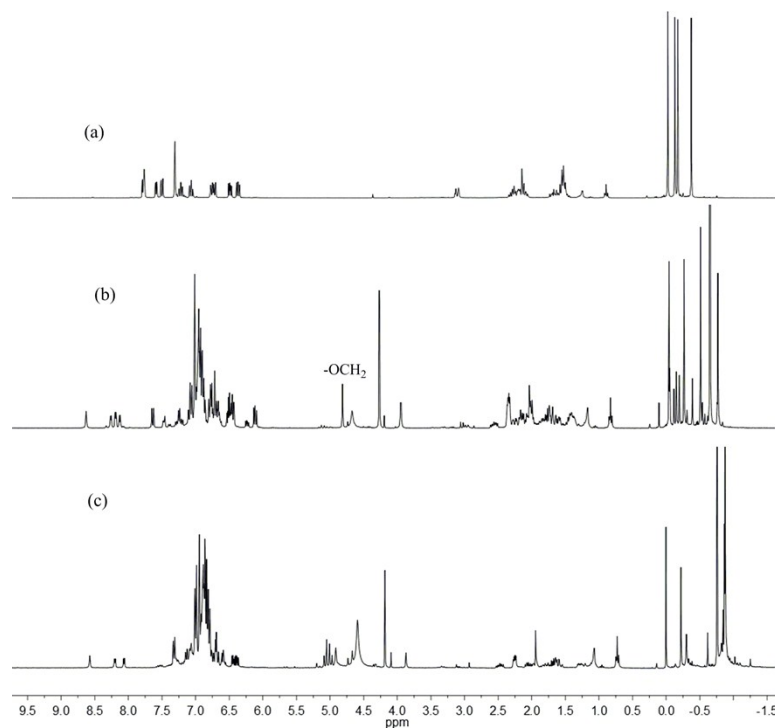

$^1\text{H}$  NMR spectrum of a reaction between **C3** and BnOH in a 1 : 1 ratio in benzene- $d_6$ . (a) **C3**:  $[\text{L1Al}_2\text{Me}_4]$  (b) **C3** +1 equivalent BnOH after 10 minutes, (c) **C3** +1 equivalent BnOH after 20 minutes
